# Supplementary material
Source: PubMed Central journal article supplement (PMC3167111)

Contents of supplemental material:

Supplemental Table 1. Primer sequences for RT-PCR.

Supplemental Figure 1. Immunocytochemistry of CK14 expression by cultured esophageal keratinocytes .

Supplemental Figure 2. Keratinocyte sensitivity to camphor measured with Ca<sup>2+</sup>-imaging.

**Supplemental Table 1.** Primer sequences for RT-PCR.

|          |                                |
|----------|--------------------------------|
| mMHC2-F  | CTAACAGACAGGGAGAATCAGTCAATC    |
| mMHC2-R  | TATAGATGAGACTTTTTTCATCATTTGTAA |
| mCK14-F  | AGAATAACCTGGAGGAGACCAAAG       |
| mCK14-R  | TTTTGTGCAACTCAGAAAAAGAAG       |
| mTRPV2-F | ACCGCATGGTGGTTTTAGAG           |
| mTRPV2-R | CTACAGCAAAGCCGAAAAGG           |
| mTRPV3-F | CCCCATCCTCTTTCTCTTCC           |
| mTRPV3-R | CGACGTTTCTGGGAATTCAT           |
| mTRPV4-F | ACAACACCCGAGAGAACACC           |
| mTRPV4-R | CCCAAACCTTACGCCACTTGT          |
| mVNUT-F  | GCCCTCTCTCAGGTTTCAGTG          |
| mVNUT-R  | ACCTTGTTCTGGGGTCTGTG           |
| mGAPDH-F | TGAAGGGTGGAGCCAAAAGG           |
| mGAPDH-R | GGAAGAGTGGGAGTTGCTGTTG         |

(MHC2: skeletal muscle marker, CK14: keratinocyte marker, VNUT; vesicular nucleotide transporter)

**Supplemental Figure 1. legend**

CK14 immunoreactivity of cultured mouse esophageal keratinocytes.

Nearly all keratinocytes had CK14 immunoreactivity, indicating a high purity of

cultured keratinocytes. Bars indicate 50  $\mu$ M.

### **Supplemental Figure 2. legend**

Keratinocyte sensitivity to camphor as measured by a  $\text{Ca}^{2+}$ -imaging system. **A.** Traces for  $[\text{Ca}^{2+}]_i$  changes in response to the TRPV3 agonist camphor (5 mM) in WT and TRPV3KO keratinocytes (mean  $\pm$  SEM). Black bar indicates duration of camphor application. **B.**  $[\text{Ca}^{2+}]_i$  increases in the presence of camphor were significantly larger in WT keratinocytes compared with TRPV3KO cells ( $p < 0.05$ ).

# Supplemental Figure 1

Mihara et al.

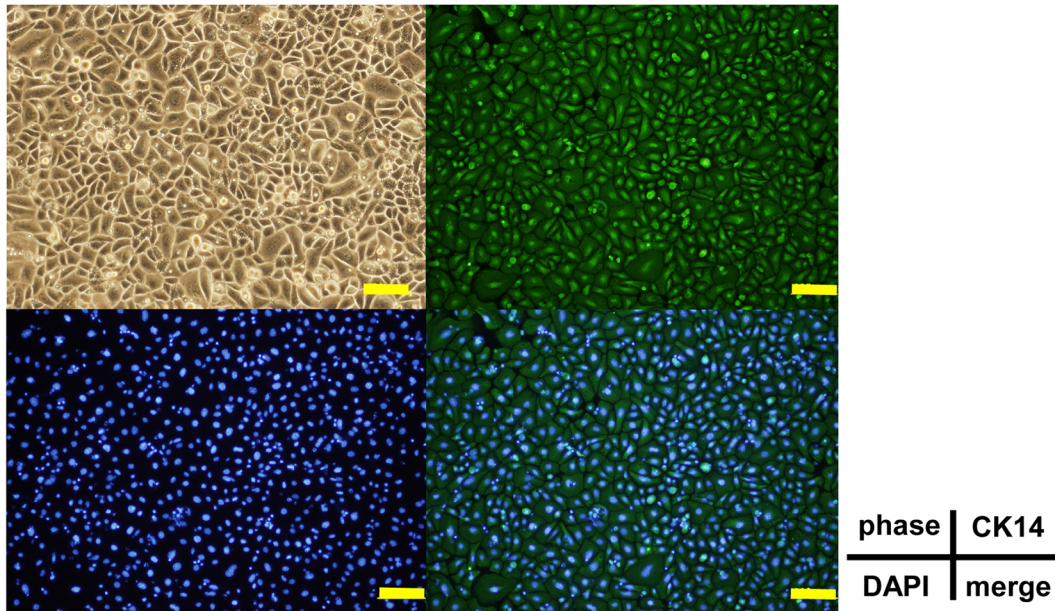

# Supplemental Figure 2

Mihara et al.

## A

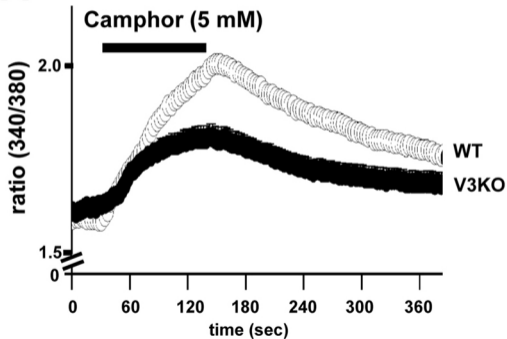

## B

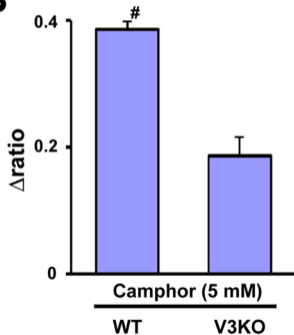

Supplement: tjp0589-3471-SD1.pdf [file tjp0589-3471-SD1.pdf]
